# Supplementary material
Source: PubMed Central journal article supplement (PMC4502952)

## Supplemental Material

Table 1. Distribution of day of the week on which first diagnosis of asthma occurred, Medicaid enrolled children in Harris County, Texas, 2005-2007.

| Day of the Week | Percent of Cases |
|-----------------|------------------|
| Sunday          | 1.6%             |
| Monday          | 21.0%            |
| Tuesday         | 20.6%            |
| Wednesday       | 17.8%            |
| Thursday        | 16.9%            |
| Friday          | 15.8%            |
| Saturday        | 6.2%             |

Table 2. Description of pollutants, meteorological conditions and aeroallergens, averaged across monitoring sites in Harris County, Texas, 2005-2007, warm season (May-October).

| Pollutant                                          | Number of Days | Mean     | Standard Deviation | Minimum | 25th percentile | 50th percentile | 75th percentile | Maximum   | Interquartile Range |
|----------------------------------------------------|----------------|----------|--------------------|---------|-----------------|-----------------|-----------------|-----------|---------------------|
| O <sub>3</sub> (8-hr max, ppb)                     | 551            | 42.93    | 17.83              | 10.82   | 27.75           | 40.75           | 56.25           | 96.88     | 28.50               |
| NO <sub>2</sub> (1-hr max, ppb)                    | 548            | 36.98    | 13.93              | 12.00   | 26.00           | 36.00           | 46.00           | 108.00    | 20.00               |
| PM <sub>2.5</sub> (24-hr mean, µg/m <sup>3</sup> ) | 525            | 16.42    | 6.41               | 2.70    | 11.80           | 15.20           | 19.90           | 44.20     | 8.10                |
| Temperature (daily max, °C)                        | 552            | 30.82    | 3.14               | 18.65   | 28.96           | 31.55           | 33.00           | 37.57     | 4.04                |
| Relative humidity (daily mean, %)                  | 550            | 70.06    | 8.74               | 41.28   | 64.65           | 70.66           | 75.74           | 90.30     | 11.09               |
| Mold (spores/m <sup>3</sup> )                      | 348            | 3,192.96 | 3,764.49           | 36.00   | 798.50          | 1,342.50        | 4,490.00        | 22,596.00 | 3,691.50            |
| Tree pollen (grains/m <sup>3</sup> )               | 334            | 41.00    | 138.43             | 0.00    | 0.00            | 0.00            | 19.00           | 1,310.00  | 19.00               |
| Grass pollen (grains/m <sup>3</sup> )              | 334            | 13.10    | 40.56              | 0.00    | 2.00            | 6.00            | 10.00           | 441.00    | 8.00                |
| Weed pollen (grains/m <sup>3</sup> )               | 334            | 98.25    | 282.94             | 0.00    | 0.00            | 3.00            | 32.00           | 1,782.00  | 32.00               |

Table 3. Description of pollutants, meteorological conditions and aeroallergens, averaged across monitoring sites in Harris County, Texas, cold season, 2005-2007, cold season (November-April).

| Pollutant                                          | Number of Days | Mean     | Standard Deviation | Minimum | 25th Percentile | 50th Percentile | 75th Percentile | Maximum   | Interquartile Range |
|----------------------------------------------------|----------------|----------|--------------------|---------|-----------------|-----------------|-----------------|-----------|---------------------|
| O <sub>3</sub> (8-hr max, ppb)                     | 543            | 32.73    | 11.86              | 3.75    | 25.13           | 30.88           | 39.59           | 80.06     | 14.46               |
| NO <sub>2</sub> (1-hr max, ppb)                    | 543            | 41.56    | 13.86              | 12.00   | 32.00           | 41.00           | 50.00           | 105.00    | 18.00               |
| PM <sub>2.5</sub> (24-hr mean, µg/m <sup>3</sup> ) | 510            | 13.48    | 5.15               | 2.75    | 9.80            | 12.80           | 16.20           | 33.85     | 6.40                |
| Temperature (daily max, °C)                        | 543            | 20.83    | 5.66               | 2.75    | 17.22           | 22.15           | 25.10           | 31.57     | 7.88                |
| Relative humidity (daily mean, %)                  | 543            | 69.21    | 13.95              | 27.26   | 60.03           | 72.22           | 79.47           | 93.21     | 19.44               |
| Mold (spores/m <sup>3</sup> )                      | 327            | 2,134.36 | 2,211.96           | 40.00   | 629.00          | 1,215.00        | 2,888.00        | 11,507.00 | 2,259.00            |
| Tree pollen (grains/m <sup>3</sup> )               | 323            | 537.61   | 1,040.64           | 0.00    | 10.00           | 82.00           | 443.00          | 6,776.00  | 433.00              |
| Grass pollen (grains/m <sup>3</sup> )              | 323            | 13.79    | 33.25              | 0.00    | 0.00            | 4.00            | 10.00           | 255.00    | 10.00               |
| Weed pollen (grains/m <sup>3</sup> )               | 316            | 2.93     | 12.35              | 0.00    | 0.00            | 0.00            | 0.00            | 137.00    | 0.00                |

Table 4. Spearman rank-correlation matrix for pollutants, meteorological variables and aeroallergens, averaged across monitoring sites in Harris County, Texas, 2005-2007.

| Pollutant                             | O <sub>3</sub> (8-hour mean) | NO <sub>2</sub> (1-hour maximum) | PM <sub>2.5</sub> (24-hour mean) | Temperature (daily maximum, °C) | Relative humidity (daily mean, %) | Mold (spores/m <sup>3</sup> ) | Tree pollen (grains/m <sup>3</sup> ) | Grass pollen (grains/m <sup>3</sup> ) | Weed pollen (grains/m <sup>3</sup> ) |
|---------------------------------------|------------------------------|----------------------------------|----------------------------------|---------------------------------|-----------------------------------|-------------------------------|--------------------------------------|---------------------------------------|--------------------------------------|
| O <sub>3</sub> (8-hour mean)          | 1.00                         |                                  |                                  |                                 |                                   |                               |                                      |                                       |                                      |
| NO <sub>2</sub> (1-hour max)          | 0.49*                        | 1.00                             |                                  |                                 |                                   |                               |                                      |                                       |                                      |
| PM <sub>2.5</sub> (24-hour mean)      | 0.32*                        | 0.21*                            | 1.00                             |                                 |                                   |                               |                                      |                                       |                                      |
| Temperature (daily max, °C)           | 0.33*                        | -0.23*                           | 0.36*                            | 1.00                            |                                   |                               |                                      |                                       |                                      |
| Relative humidity (daily mean, %)     | -0.49*                       | -0.39*                           | -0.04                            | 0.02                            | 1.00                              |                               |                                      |                                       |                                      |
| Mold (spores/m <sup>3</sup> )         | -0.05                        | -0.01                            | -0.04                            | -0.01                           | 0.13*                             | 1.00                          |                                      |                                       |                                      |
| Tree pollen (grains/m <sup>3</sup> )  | 0.04                         | 0.15*                            | -0.18*                           | -0.49*                          | 0.04                              | 0.14*                         | 1.00                                 |                                       |                                      |
| Grass pollen (grains/m <sup>3</sup> ) | 0.23*                        | 0.02                             | -0.02                            | 0.09*                           | -0.03                             | 0.25*                         | 0.31*                                | 1.00                                  |                                      |
| Weed pollen (grains/m <sup>3</sup> )  | 0.09*                        | 0.06                             | 0.06                             | 0.24*                           | -0.02                             | 0.50*                         | -0.14*                               | 0.17*                                 | 1.00                                 |

\*p<0.05

Figure 1. Adjusted odds ratios and 95% confidence intervals for O<sub>3</sub> and NO<sub>2</sub> exposure metrics determined by (a) Harris County averages, (b) the three closest monitors to centroid of zip code of residence, and (c) monitors within 6 miles of the zip code of residence. ORs presented are per 10 ppb increase in short-term pollutant levels. Study population includes Harris County, Texas children enrolled in Medicaid between 2005 and 2007. All models are adjusted for same-day maximum temperature, mean relative humidity and mold spore, tree pollen, grass pollen and weed pollen counts. L0 through L5 indicate single same-day through lag 5-day pollutant values, and L01 through L05 indicate 2-day through 6-day cumulative mean pollutant values.

Figure 1

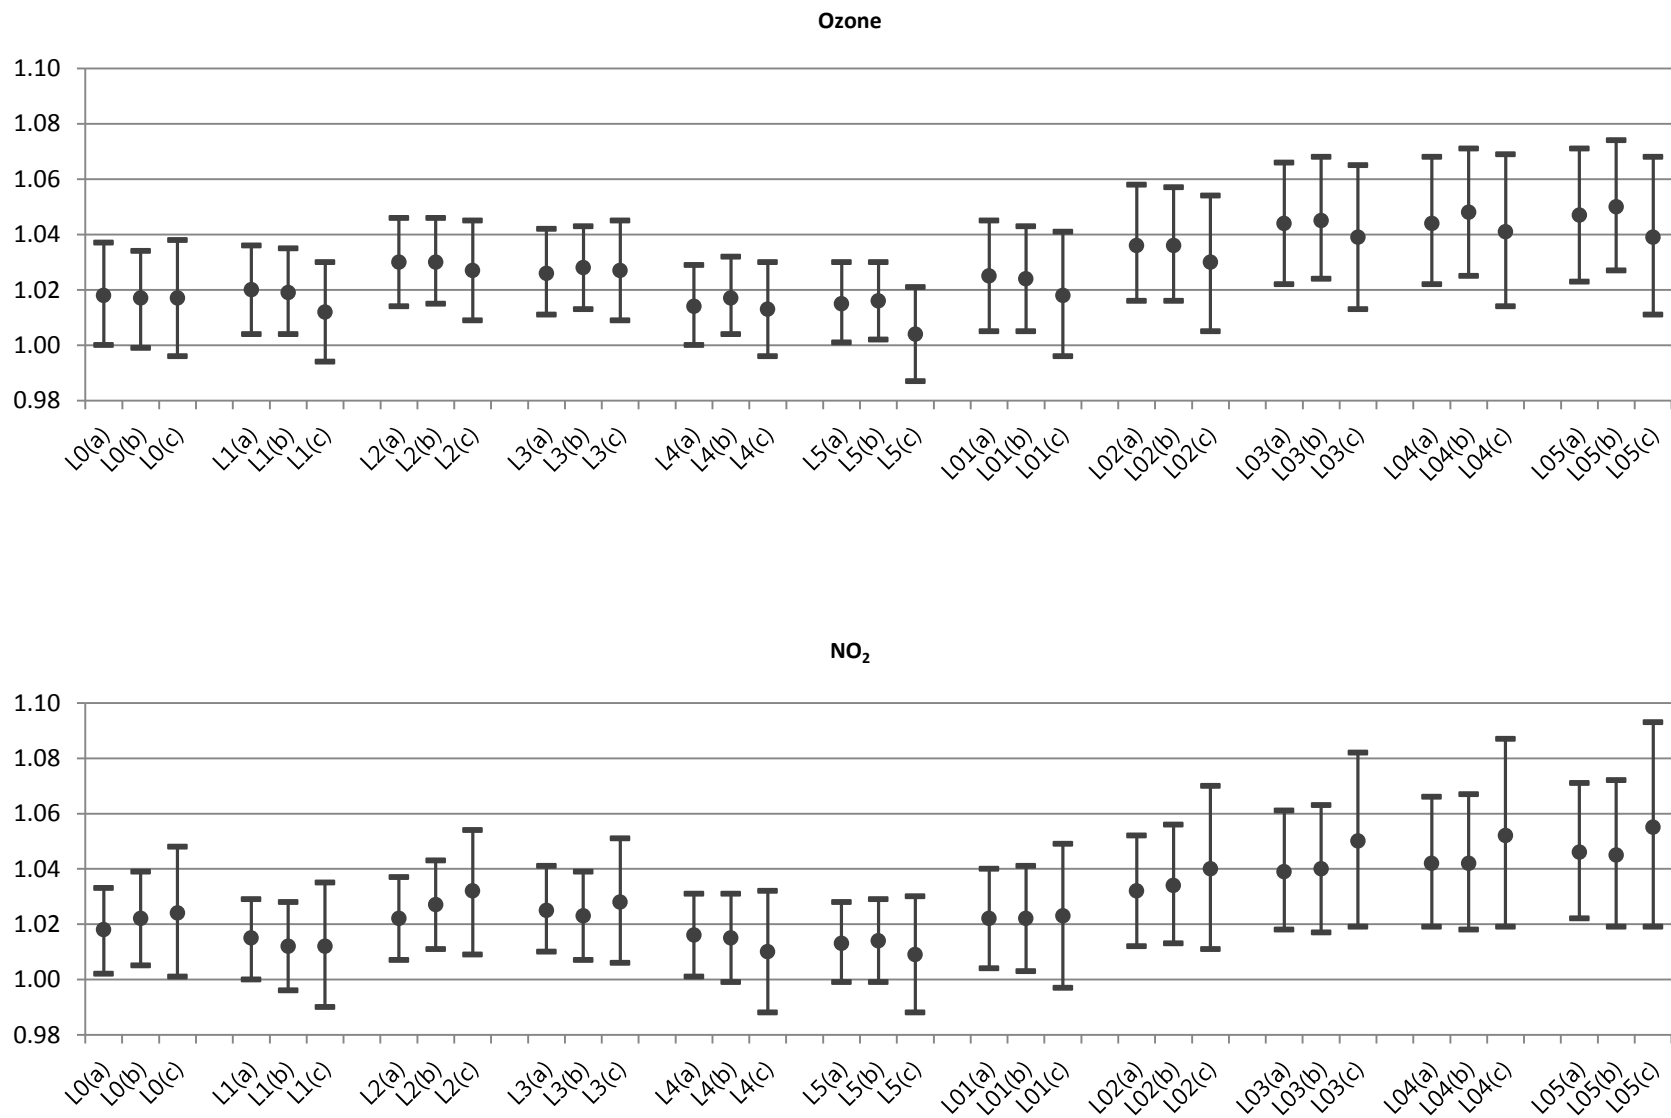

Supplement: NIHMS681699-supplement-Supplemental_tables_and_figures.pdf [file NIHMS681699-supplement-Supplemental_tables_and_figures.pdf]
